# Supplementary material
Source: PubMed Central journal article supplement (PMC3716462)
Supplement: NIHMS264518-supplement-supplemental_material.pdf [file NIHMS264518-supplement-supplemental_material.pdf]

**APPENDIX E1.** Expanded statistical analysis methods and results.

Analysis of covariance using the rank transformation<sup>11</sup> was performed to adjust for covariates. In the ranked analysis of covariance models, candidate covariates included the 4 levels of stratification at randomization (known coronary disease as binary, time of day of presentation 6 AM to 3 PM or 3 PM to 6 AM), age (continuous and binary as  $\geq 65$  years), TIMI risk score, sex, race, confirmed previous heart failure, confirmed previous MI, confirmed previous coronary revascularization, and chest pain at ED arrival. First, interactions between treatment group and each covariate were examined. One significant interaction was present between

aged 65 years or older and treatment group but not included in the final model because its effect had a quantitative effect only and complicated the interpretation of the main effects of the model. The 4 stratification levels were then entered into the models. Confounding was evaluated by comparing the effect of treatment group between the full and reduced models. In the full model, the observation unit–cardiac MRI rank reduction was 18.5 ( $P < .001$ ); in the reduced model, the observation unit–cardiac MRI rank reduction was 22.4 ( $P < .001$ ). The full model is displayed in Table E3. For hypothesis-generation purposes, post hoc subgroup analyses were conducted and reported in Table E4.

**Table E1.** Typical cardiac imaging parameters.

| Component                                                                                               | Pulse Sequence       | Orientation                                     | Matrix  | FOV, mm | Slice Thickness, mm | Flip Angle, degrees | Bandwidth, Hz/Pixel | TE, ms | TR, ms |
|---------------------------------------------------------------------------------------------------------|----------------------|-------------------------------------------------|---------|---------|---------------------|---------------------|---------------------|--------|--------|
| Resting wall motion                                                                                     | trueFISP             | 2-, 3-, And 4-chamber and 3 LV short-axis views | 192×156 | 340     | 8                   | 75                  | 930                 | 1      | ≈47    |
| T2 dark blood (body coil)                                                                               | IR turboSE 650 ms TI | 3 LV short-axis views                           | 192×140 | 360     | 7                   | 60                  | 180                 | 87     | 1 RR   |
| <b>Contrast injection (gadopentetate dimeglumine 0.1 mmol/kg) and stress agent infusion (adenosine)</b> |                      |                                                 |         |         |                     |                     |                     |        |        |
| Stress perfusion                                                                                        | Turbo-FLASH          | 3 LV short-axis views                           | 192×144 | 360     | 8                   | 12                  | 650                 | 1      | ≈190   |
| <b>Contrast injection (gadopentetate dimeglumine 0.1 mmol/kg)</b>                                       |                      |                                                 |         |         |                     |                     |                     |        |        |
| Rest perfusion                                                                                          | Turbo-FLASH          | 3 LV short-axis views                           | 192×144 | 360     | 8                   | 12                  | 650                 | 1      | ≈190   |
| Delayed enhancement                                                                                     | FLASH IR 300-ms TI   | 2-, 3-, And 4-chamber and 10 short-axis views   | 192×140 | 320     | 8                   | 25                  | 1,530               | 2      | 2 RR   |

FOV, Field of view; TE, echo time; TR, pulse repetition time; LV, left ventricle; IR, inversion recovery; TI, inversion time; trueFISP, True fast imaging with steady state precession; SE, spin echo; FLASH, fast low angle shot.

**Table E2.** Imaging results for OU-CMR participants.\*

|        | CMR Results        |                       |    |
|--------|--------------------|-----------------------|----|
|        | Inducible Ischemia | No Inducible Ischemia |    |
| ACS    | 1                  | 0                     | 1  |
| No ACS | 5                  | 43                    | 48 |
| Total  | 6                  | 43                    | 49 |

\*Sensitivity 100% (95% CI 3% to 100%); specificity 90% (95% CI 77% to 97%).  
Stress agent: adenosine 43 of 49; dobutamine 6 of 49.

**Table E3.** Median cost among subgroups and adjusted statistical significance from the full model.

| Subgroup Name                                 | Number of Participants | Median Cost, % | Adjusted P Value |
|-----------------------------------------------|------------------------|----------------|------------------|
| <b>Treatment group</b>                        |                        |                | .003             |
| Inpatient care                                | 53                     | 2,680          |                  |
| OU-CMR                                        | 57                     | 2,062          |                  |
| <b>Age, y</b>                                 |                        |                | .93              |
| ≥65                                           | 18                     | 2,607          |                  |
| <65                                           | 92                     | 2,383          |                  |
| Age, y (continuous)                           | 110                    | N/A            | .50              |
| TIMI risk score (continuous)                  | 110                    | N/A            | .69              |
| <b>Sex</b>                                    |                        |                | .37              |
| Male                                          | 55                     | 2,559          |                  |
| Female                                        | 55                     | 2,250          |                  |
| <b>Race</b>                                   |                        |                | .18              |
| Caucasian                                     | 75                     | 2,551          |                  |
| Other                                         | 35                     | 2,243          |                  |
| <b>Time of presentation</b>                   |                        |                | .33              |
| 6 AM–3 PM                                     | 90                     | 2,388          |                  |
| 3 PM–6 AM                                     | 20                     | 2,507          |                  |
| <b>Established CAD</b>                        |                        |                | .58              |
| Established CAD                               | 28                     | 2,606          |                  |
| No established CAD                            | 82                     | 2,342          |                  |
| <b>Previous heart failure (confirmed)</b>     |                        |                | .04              |
| Previous heart failure                        | 5                      | 3,159          |                  |
| No previous heart failure                     | 105                    | 2,357          |                  |
| <b>Previous MI (confirmed)</b>                |                        |                | .46              |
| Previous MI                                   | 22                     | 2,644          |                  |
| No previous MI                                | 88                     | 2,310          |                  |
| <b>Previous revascularization (confirmed)</b> |                        |                | .26              |
| Previous revascularization                    | 24                     | 2,606          |                  |
| No previous revascularization                 | 86                     | 2,342          |                  |
| <b>Chest pain at ED arrival</b>               |                        |                | .03              |
| Chest pain                                    | 76                     | 2,635          |                  |
| No chest pain                                 | 34                     | 2,088          |                  |

**Table E4.** Post hoc subgroup analyses of median cost by subgroup.

| Subgroup Name                                 | Conventional Care |          | OU-CMR |          | P Value |
|-----------------------------------------------|-------------------|----------|--------|----------|---------|
|                                               | No.               | Cost, \$ | No.    | Cost, \$ |         |
| <b>Age, y</b>                                 |                   |          |        |          |         |
| ≥65                                           | 10                | 2,661    | 8      | 2,114    | .003    |
| <65                                           | 47                | 3,250    | 45     | 1,985    | .014    |
| <b>Sex</b>                                    |                   |          |        |          |         |
| Male                                          | 30                | 2,742    | 25     | 2,150    | .12     |
| Female                                        | 27                | 2,662    | 28     | 2,043    | <.001   |
| <b>Race</b>                                   |                   |          |        |          |         |
| Caucasian                                     | 40                | 2,799    | 35     | 2,062    | .002    |
| Other                                         | 17                | 2,636    | 18     | 2,090    | .092    |
| <b>Time of presentation</b>                   |                   |          |        |          |         |
| 6 AM–3 PM                                     | 46                | 2,674    | 44     | 2,057    | .003    |
| 3 PM–6 AM                                     | 11                | 2,707    | 9      | 2,129    | .047    |
| <b>Established CAD</b>                        |                   |          |        |          |         |
| Established CAD                               | 16                | 3,212    | 12     | 2,079    | .030    |
| No established CAD                            | 41                | 2,661    | 41     | 2,062    | .007    |
| <b>Previous heart failure (confirmed)</b>     |                   |          |        |          |         |
| Previous heart failure                        | 3                 | 2,661    | 2      | 5,296    | .79     |
| No previous heart failure                     | 54                | 2,693    | 51     | 2,051    | <.001   |
| <b>Previous revascularization (confirmed)</b> |                   |          |        |          |         |
| Previous revascularization                    | 15                | 3,068    | 9      | 2,044    | .023    |
| No previous revascularization                 | 42                | 2,664    | 44     | 2,088    | .006    |
